# Supplementary material for: HIV testing among men who have sex with men in Tijuana, Mexico: a cross-sectional study
Source: HighWire-hosted journal article supplement (doi:10.1136/bmjopen-2015-010388), 2016-02-01

**Supplemental Figure 1.** Respondent-driven sampling (RDS) network among 201 men who have sex with men in Tijuana, Mexico (red = 10 seeds; blue = 191 eligible peer-recruits).

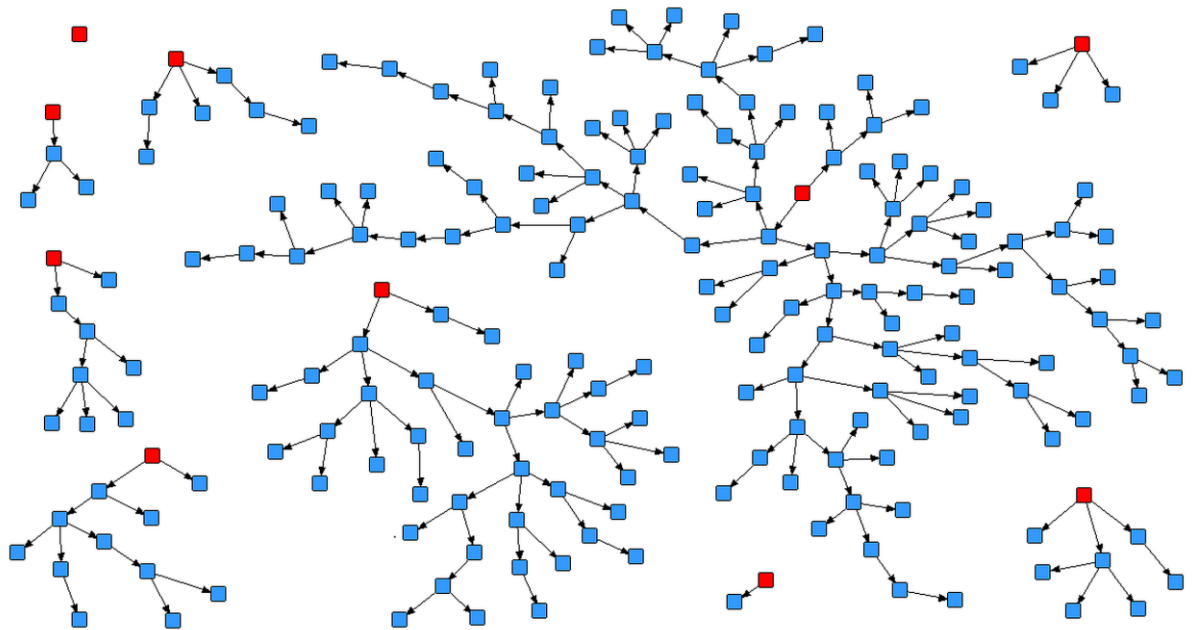

Supplement: bmjopen-2015-010388supp_figure.pdf [file bmjopen-2015-010388supp_figure.pdf]
