# Supplementary material for: HIV testing among men who have sex with men in Tijuana, Mexico: a cross-sectional study
Source: HighWire-hosted journal article supplement (doi:10.1136/bmjopen-2015-010388), 2016-02-01
Supplement: bmjopen-2015-010388supp_tables.pdf [file bmjopen-2015-010388supp_tables.pdf]

**Supplemental Table 1. Number of recruits and recruitment waves by seed.**

| <b>Seed</b> | <b># Participants Recruited</b> | <b># Waves</b> |
|-------------|---------------------------------|----------------|
| 1           | 3                               | 2              |
| 2           | 39                              | 8              |
| 3           | 3                               | 1              |
| 4           | 6                               | 3              |
| 5           | 7                               | 2              |
| 6           | 0                               | 0              |
| 7           | 113                             | 11             |
| 8           | 11                              | 5              |
| 9           | 1                               | 1              |
| 10          | 8                               | 4              |

**Supplemental Table 2. RDSAT estimates of homophily and mean network size by socio-**

**demographics, sexual behaviors, substance use, abuse history, HIV knowledge, and STI history.**

|                                        | <b>Homophily<sup>a</sup></b> | <b>Mean Network Size</b> |
|----------------------------------------|------------------------------|--------------------------|
| <b>Socio-demographics</b>              |                              |                          |
| Age (in years)                         |                              |                          |
| 18-24                                  | 0.076                        | 13.5                     |
| 25-29                                  | -0.002                       | 18.0                     |
| 30-34                                  | -0.054                       | 18.2                     |
| ≥35                                    | -0.053                       | 8.3                      |
| Gender identity                        |                              |                          |
| Male                                   | 0.152                        | 14.5                     |
| Transgender female (male-to-female)    | 0.216                        | 10.6                     |
| Sexual Orientation                     |                              |                          |
| Homosexual or gay                      | 0.286                        | 13.7                     |
| Bisexual                               | 0.141                        | 14.3                     |
| Heterosexual or straight               | -1.000                       | 20.7                     |
| Birthplace                             |                              |                          |
| Tijuana, Mexico                        | 0.256                        | 16.9                     |
| Outside Tijuana in Mexico              | 0.110                        | 12.9                     |
| United States                          | -1.000                       | 7.7                      |
| Education                              |                              |                          |
| Less than a high school education      | 0.092                        | 14.0                     |
| At least a high school education       | 0.226                        | 14.2                     |
| Employment status                      |                              |                          |
| Unemployed                             | 0.075                        | 12.2                     |
| Employed                               | 0.188                        | 14.4                     |
| Monthly income                         |                              |                          |
| < 3500 pesos                           | -0.012                       | 15.4                     |
| ≥ 3500 pesos                           | 0.078                        | 12.6                     |
| Ever incarcerated (jail or prison)     |                              |                          |
| No                                     | 0.158                        | 14.6                     |
| Yes                                    | 0.024                        | 13.9                     |
| Ever traveled to the US                |                              |                          |
| No                                     | 0.046                        | 14.6                     |
| Yes                                    | 0.195                        | 13.3                     |
| Ever deported from the US              |                              |                          |
| No                                     | -0.020                       | 14.1                     |
| Yes                                    | 0.158                        | 18.2                     |
| <b>Sexual behaviors</b>                |                              |                          |
| Traded sex for money (≤6 months)       |                              |                          |
| No                                     | 0.288                        | 12.7                     |
| Yes                                    | 0.312                        | 16.1                     |
| Any female sexual partners (≤2 months) |                              |                          |

|                                                                                                    |        |      |
|----------------------------------------------------------------------------------------------------|--------|------|
| No                                                                                                 | 0.400  | 12.1 |
| Yes                                                                                                | 0.243  | 12.9 |
| Spouse or live-in partner ( $\leq 2$ months)                                                       |        |      |
| No                                                                                                 | 0.270  | 15.8 |
| Yes                                                                                                | 0.113  | 11.4 |
| Steady non-live-in partner ( $\leq 2$ months)                                                      |        |      |
| No                                                                                                 | -0.260 | 13.1 |
| Yes                                                                                                | -0.030 | 14.7 |
| Casual partner ( $\leq 2$ months)                                                                  |        |      |
| No                                                                                                 | -0.168 | 13.1 |
| Yes                                                                                                | 0.122  | 14.0 |
| Anonymous partner ( $\leq 2$ months)                                                               |        |      |
| No                                                                                                 | -0.069 | 11.6 |
| Yes                                                                                                | 0.046  | 18.4 |
| Visited a bar, nightclub or disco to meet male sexual partners ( $\leq 2$ months)                  |        |      |
| No                                                                                                 | -0.029 | 12.6 |
| Yes                                                                                                | 0.142  | 18.7 |
| Visited a bathhouse or sauna to meet male sexual partners ( $\leq 2$ months)                       |        |      |
| No                                                                                                 | -0.022 | 13.8 |
| Yes                                                                                                | 0.028  | 17.5 |
| Visited an adult movie theater to meet male sexual partners ( $\leq 2$ months)                     |        |      |
| No                                                                                                 | -0.048 | 14.3 |
| Yes                                                                                                | 0.049  | 14.4 |
| Visited a dark room to meet male sexual partners ( $\leq 2$ months)                                |        |      |
| No                                                                                                 | -0.050 | 13.9 |
| Yes                                                                                                | -1.000 | 17.4 |
| Visited an internet café to meet male sexual partners ( $\leq 2$ months)                           |        |      |
| No                                                                                                 | 0.397  | 13.9 |
| Yes                                                                                                | 0.248  | 17.4 |
| Visited a public place (e.g., park, restroom, bus) to meet male sexual partners ( $\leq 2$ months) |        |      |
| No                                                                                                 | -0.047 | 12.3 |
| Yes                                                                                                | 0.214  | 22.9 |
| <b>Substance use</b>                                                                               |        |      |
| Lifetime marijuana use                                                                             |        |      |
| No                                                                                                 | 0.119  | 16.7 |
| Yes                                                                                                | 0.012  | 11.7 |
| Lifetime methamphetamine use                                                                       |        |      |
| No                                                                                                 | 0.171  | 13.7 |
| Yes                                                                                                | 0.114  | 15.4 |
| Lifetime cocaine use                                                                               |        |      |
| No                                                                                                 | 0.224  | 14.4 |
| Yes                                                                                                | 0.044  | 13.9 |
| Lifetime amyl nitrite (poppers) use                                                                |        |      |

|                                                      |        |      |
|------------------------------------------------------|--------|------|
| No                                                   | -0.004 | 14.0 |
| Yes                                                  | 0.144  | 14.9 |
| Lifetime heroin use                                  |        |      |
| No                                                   | 0.216  | 13.9 |
| Yes                                                  | 0.176  | 16.8 |
| Past month marijuana use                             |        |      |
| No                                                   | 0.239  | 15.0 |
| Yes                                                  | 0.140  | 12.5 |
| Past month methamphetamine use                       |        |      |
| No                                                   | 0.212  | 13.4 |
| Yes                                                  | 0.189  | 17.1 |
| Past month cocaine use                               |        |      |
| No                                                   | 0.111  | 13.8 |
| Yes                                                  | 0.069  | 18.5 |
| Past month amyl nitrite (poppers) use                |        |      |
| No                                                   | 0.163  | 14.6 |
| Yes                                                  | 0.286  | 7.6  |
| Past month heroin use                                |        |      |
| No                                                   | 0.281  | 14.1 |
| Yes                                                  | 0.273  | 14.8 |
| Any injection drug use ( $\leq 1$ month)             |        |      |
| No                                                   | 0.251  | 14.4 |
| Yes                                                  | 0.211  | 15.9 |
| Hazardous alcohol consumption ( $\leq 12$ months)    |        |      |
| No                                                   | -0.092 | 13.8 |
| Yes                                                  | 0.126  | 14.2 |
| Any drug use before/during sex ( $\leq 2$ months)    |        |      |
| No                                                   | 0.000  | 14.1 |
| Yes                                                  | 0.151  | 15.3 |
| Any alcohol use before/during sex ( $\leq 2$ months) |        |      |
| No                                                   | -0.095 | 12.0 |
| Yes                                                  | 0.077  | 17.0 |
| <b>History of abuse</b>                              |        |      |
| Ever experienced sexual abuse                        |        |      |
| No                                                   | 0.042  | 12.3 |
| Yes                                                  | 0.186  | 19.1 |
| Ever experienced physical abuse                      |        |      |
| No                                                   | -0.053 | 14.5 |
| Yes                                                  | -0.064 | 13.2 |
| Ever experienced emotional abuse                     |        |      |
| No                                                   | -0.049 | 13.7 |
| Yes                                                  | 0.014  | 15.5 |
| <b>HIV/STI knowledge</b>                             |        |      |

|                                                            |        |      |
|------------------------------------------------------------|--------|------|
| HIV/STI counseling or education program ( $\leq 2$ months) |        |      |
| No                                                         | -0.042 | 14.0 |
| Yes                                                        | 0.029  | 17.2 |
| <b>HIV/STI prevalence</b>                                  |        |      |
| Tested HIV-positive                                        |        |      |
| No                                                         | 0.064  | 14.7 |
| Yes                                                        | -0.633 | 11.5 |
| Self-reported STI diagnosis ( $\leq 2$ months)             |        |      |
| No                                                         | 0.068  | 14.3 |
| Yes                                                        | -0.188 | 13.5 |
| <b>HIV testing history</b>                                 |        |      |
| Any prior HIV testing (lifetime)                           |        |      |
| No                                                         | 0.008  | 7.1  |
| Yes                                                        | 0.234  | 17.2 |
| Recent HIV testing ( $\leq 12$ months)                     |        |      |
| No                                                         | -0.048 | 9.8  |
| Yes                                                        | 0.139  | 19.8 |

---

Abbreviations: RDSAT=Respondent-Driven Sampling Analysis Tool v7.1 (Cornell University, Ithaca, NY); CAI=condomless anal intercourse.

<sup>a</sup> Homophily ranges from -1 to 1 where 0 indicates random recruitment, -1 indicates completely heterophilous recruitment, and 1 indicates completely homophilous recruitment.
